# Supplementary material for: Synthesis of Amino Acid–Naphthoquinones and In Vitro Studies on Cervical and Breast Cell Lines
Source: PubMed Central journal article supplement (PMC6930466; doi:10.3390/molecules24234285), 2019-11-25

## Supplementary data

# Synthesis of amino acid-naphthoquinones and *in vitro* studies on cervical and breast cell lines

Ernesto Rivera-Avalos <sup>1</sup>, Denisse de Loera <sup>1</sup>, Jorge G. Araujo-Huitrado <sup>2</sup>, Ismailia L. Escalante-García <sup>3</sup>, Miguel A. Muñoz-Sánchez <sup>3</sup>, Hiram Hernández <sup>3</sup>, Jesús A. López <sup>2</sup> \* and Lluvia López <sup>4</sup>\*

<sup>1</sup> School of Chemistry, Universidad Autónoma de San Luis Potosí, Av. Manuel Nava No. 6, SLP 78210, México; neto\_riava@hotmail.com (E.R.-A.); atenea.deloera@uaslp.mx (D.d.L.)

<sup>2</sup> Laboratorio de microRNAs y Cáncer, Unidad Académica de Ciencias Biológicas, Universidad Autónoma de Zacatecas, Av. Preparatoria No.301, ZAC 98068, México; jalopez2210@gmail.com (J.G.A.-H.); jalopez@uaz.edu.mx (J.A.L.)

<sup>3</sup> Unidad Académica de Ciencias Químicas, Universidad Autónoma de Zacatecas, Carr. Zacatecas – Guadalajara km 6, ZAC 98160, México; ileg@uaz.edu.mx (I.L.E.-G.); 27804270@uaz.edu.mx (M.A.M.-S.); hiram.hernandez.lopez@uaz.edu.mx (H.H.)

<sup>4</sup> Instituto de Investigación de Zonas Desérticas, Universidad Autónoma de San Luis Potosí, Altaír No. 200, SLP 78377, México; lluvia.lopez@uaslp.mx (L.L.)

\* Correspondence: lluvia.lopez@uaslp.mx (L.L.); jalopez@uaz.edu.mx (J.A.L.); Tel.: +52-444-826-2300 (L.L.); +52-492-149-2648 (J.A.L.)

## CONTENT

|                                                                                |    |
|--------------------------------------------------------------------------------|----|
| 1. Infrared characterization .....                                             | 2  |
| Amino acids-1,4-naphthoquinone derivatives: .....                              | 2  |
| Amino acids-2,3-dichloronaphthoquinone derivatives:.....                       | 4  |
| 2. NMR characterization. ....                                                  | 7  |
| Amino acids-1,4-naphthoquinone derivatives: .....                              | 7  |
| Amino acids-2,3-dichloronaphthoquinone derivatives:.....                       | 10 |
| 3. Mass spectrometry characterization of compounds 3c, 3e, 4b, 4c and 4e. .... | 14 |

# 1. Infrared characterization

Amino acids-1,4-naphthoquinone derivatives:

(3a)

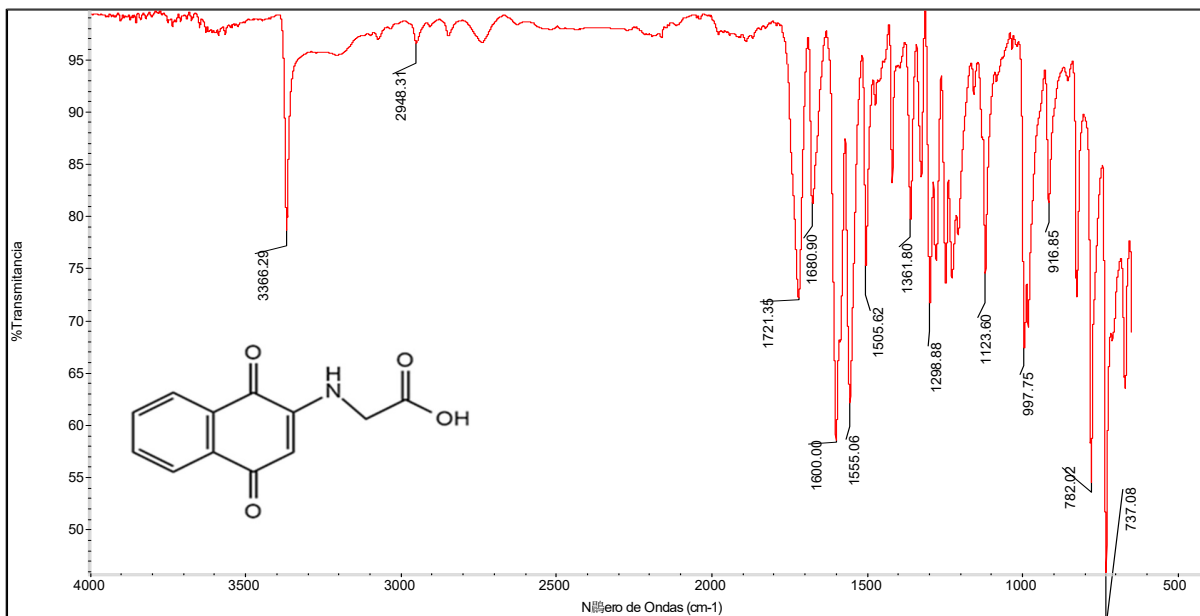

(3b)

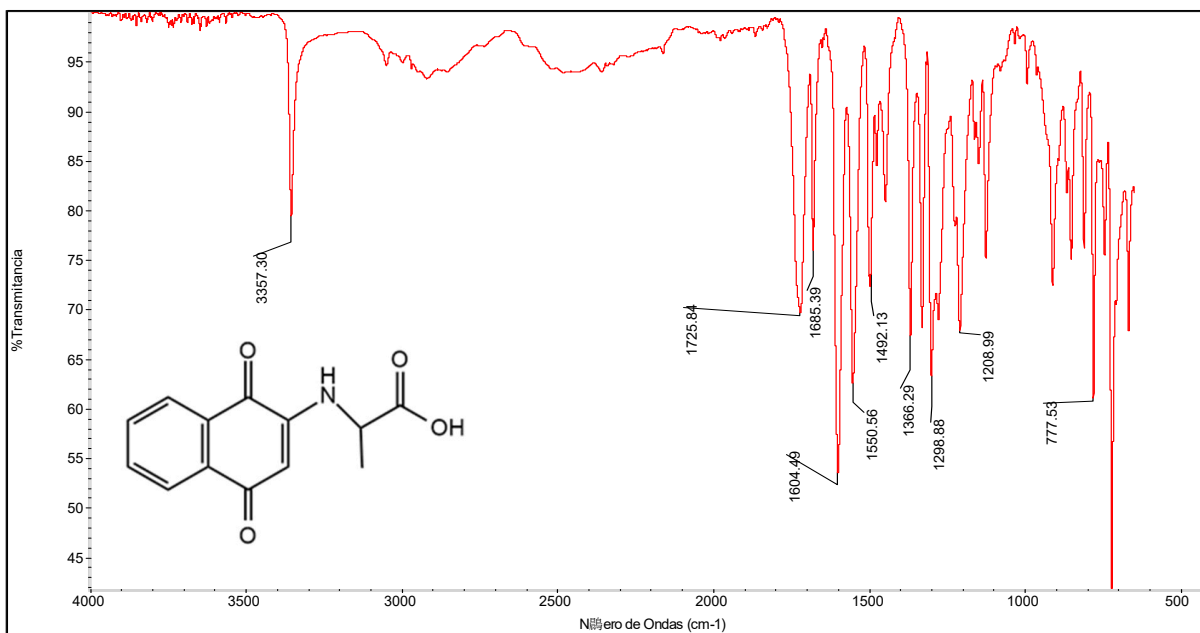

(3c)

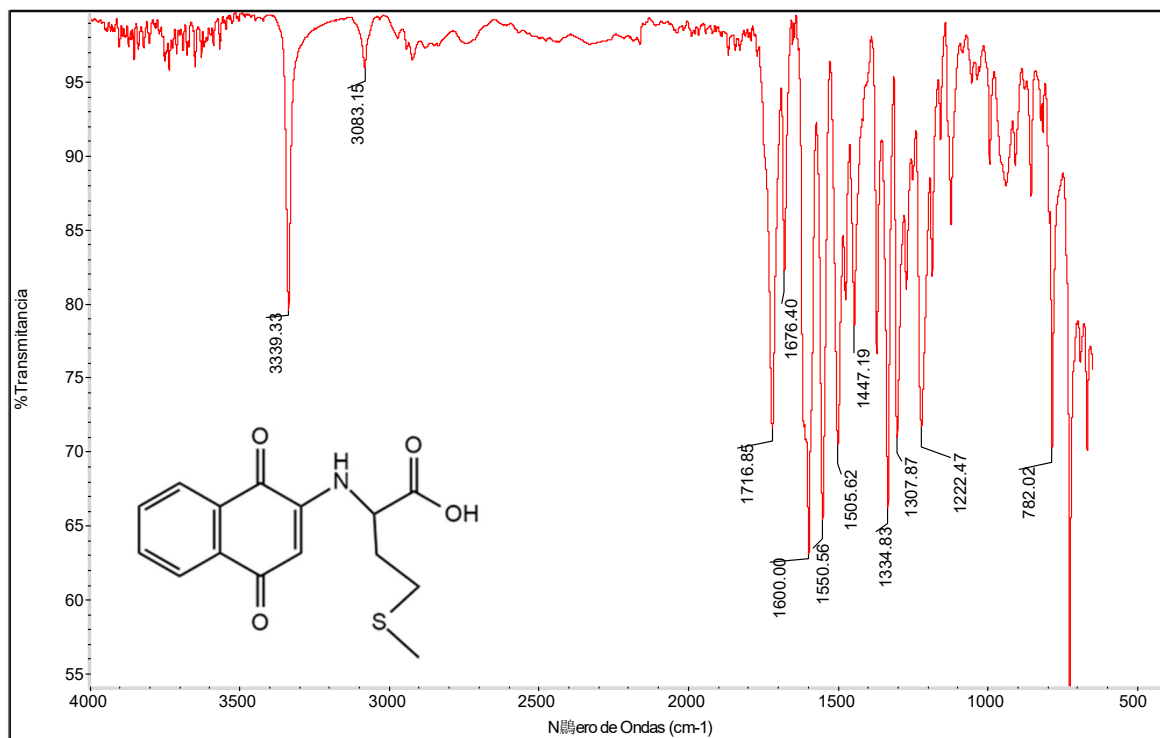

(3d)

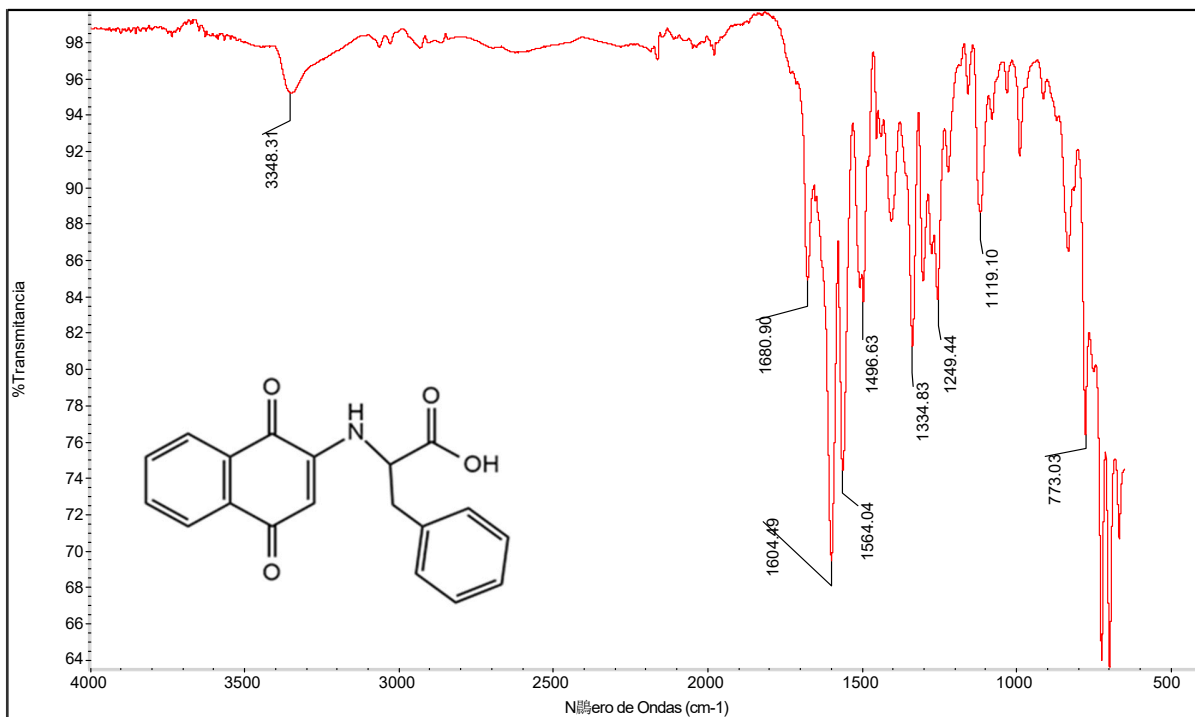

(3e)

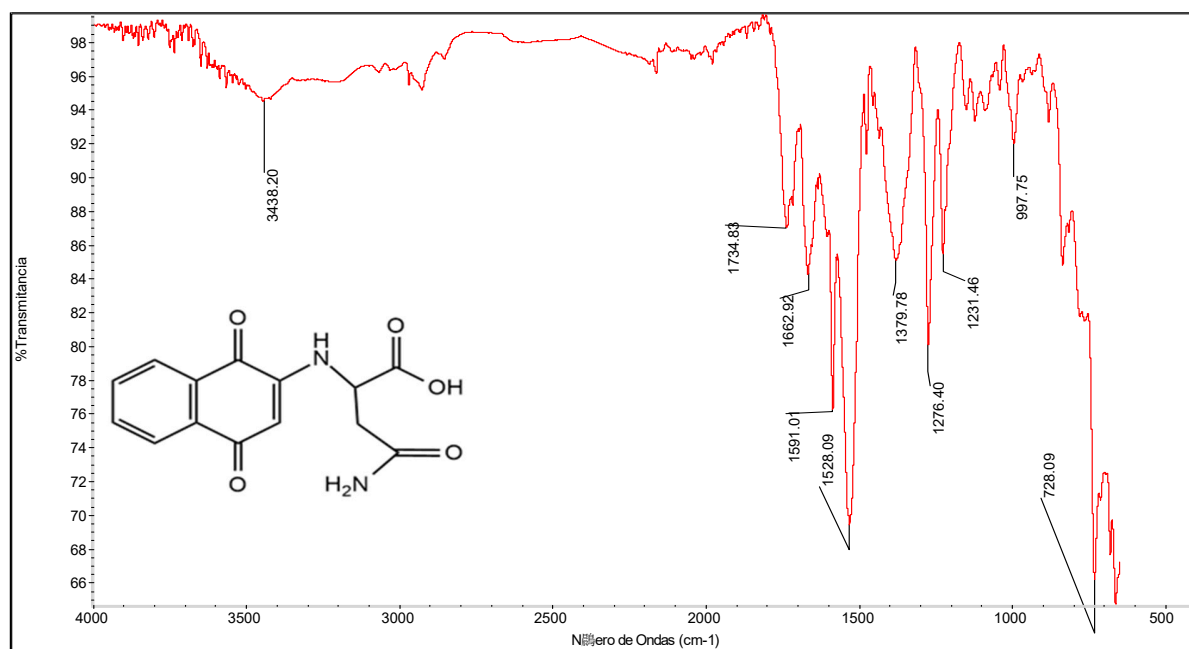

Amino acids-2,3-dichloronaphthoquinone derivatives:

(4a)

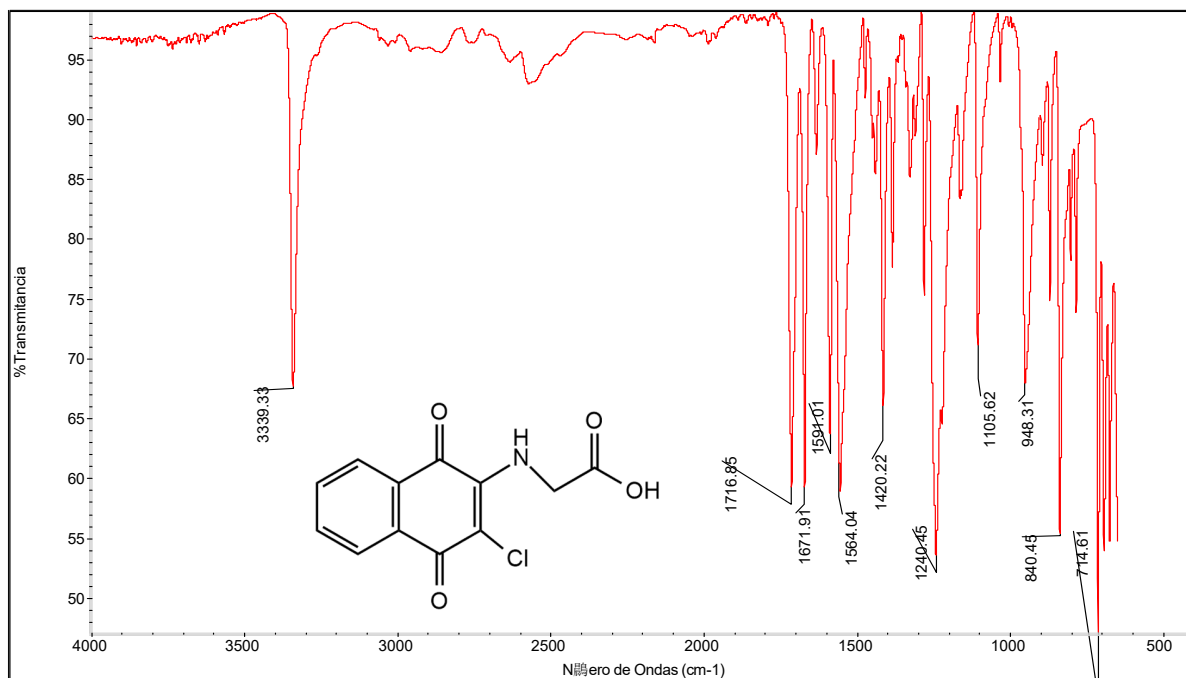

(4b)

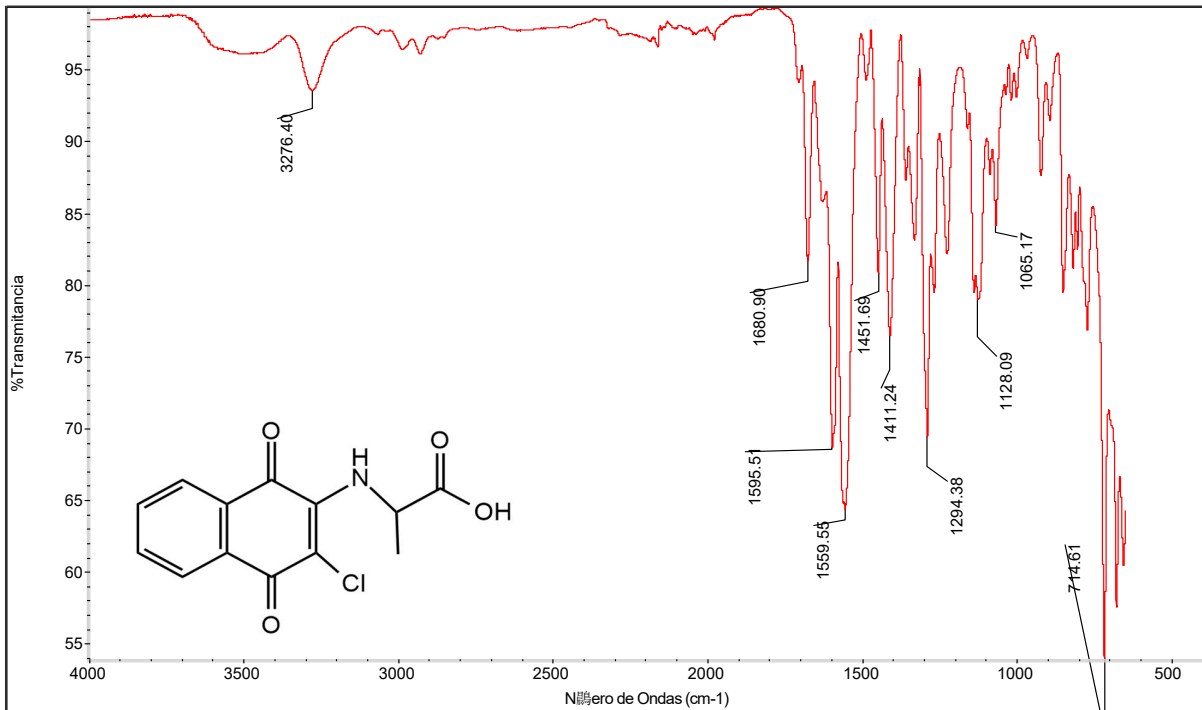

(4c)

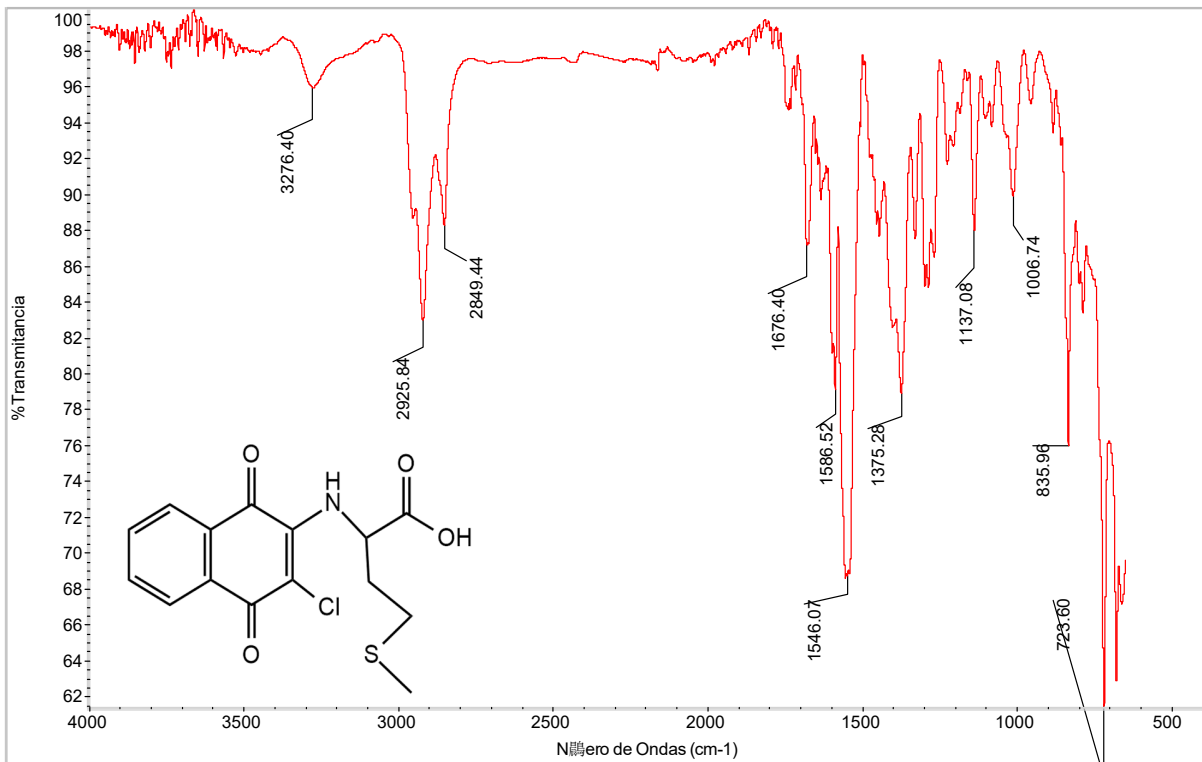

(4d)

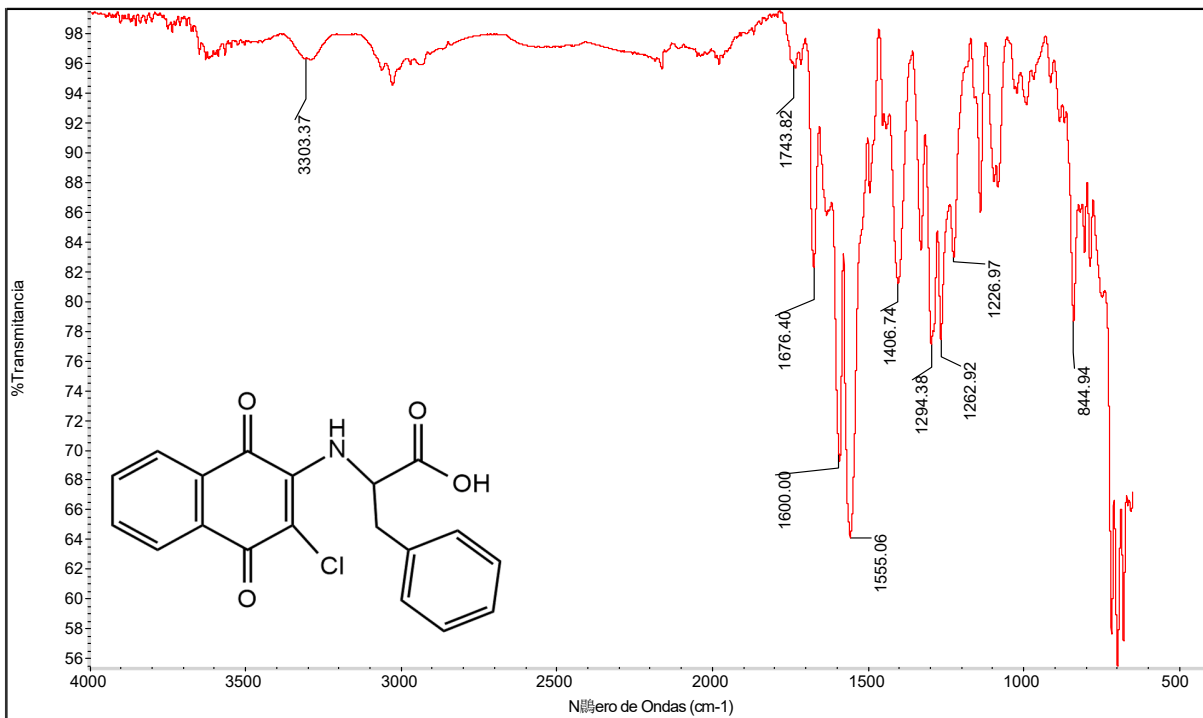

(4e)

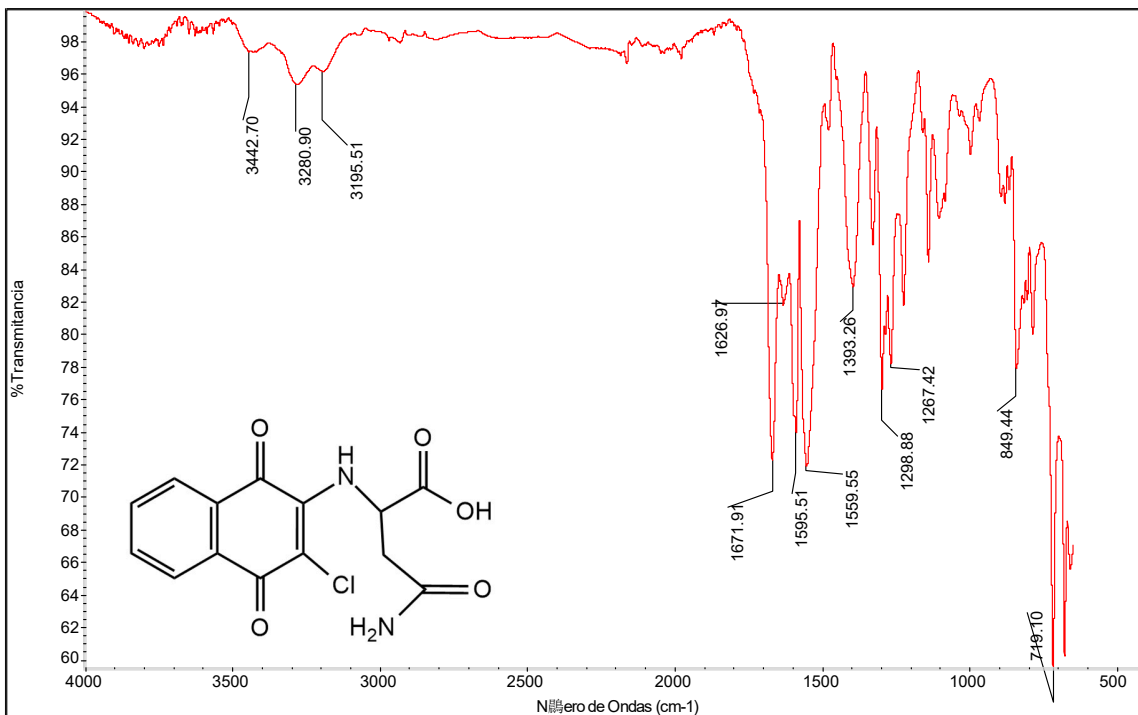

## 2. NMR characterization.

Amino acids-1,4-naphthoquinone derivatives:

**(3a)**

NG-2.1.fid

$^1\text{H}$  NMR (300 MHz,  $\text{DMSO}-d_6$ )

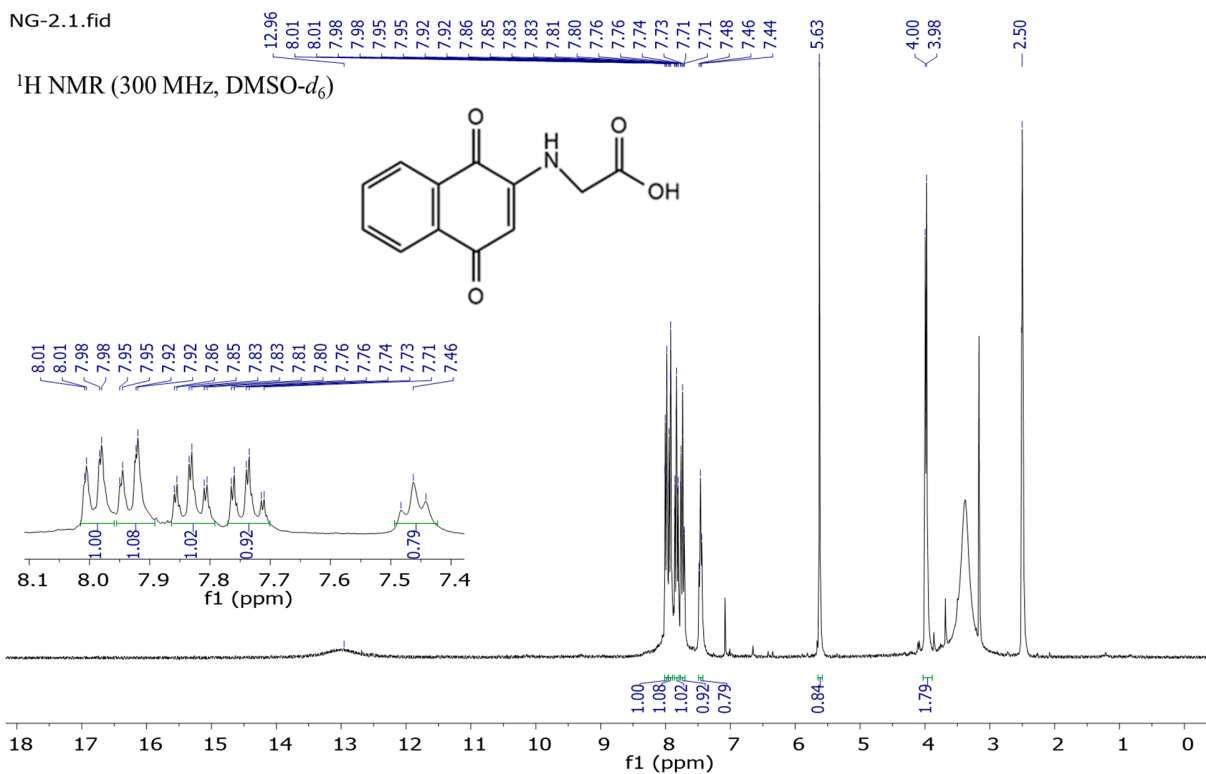

**(3b)**

NA-1.1.fid

$^1\text{H}$  NMR (300 MHz,  $\text{DMSO}-d_6$ )

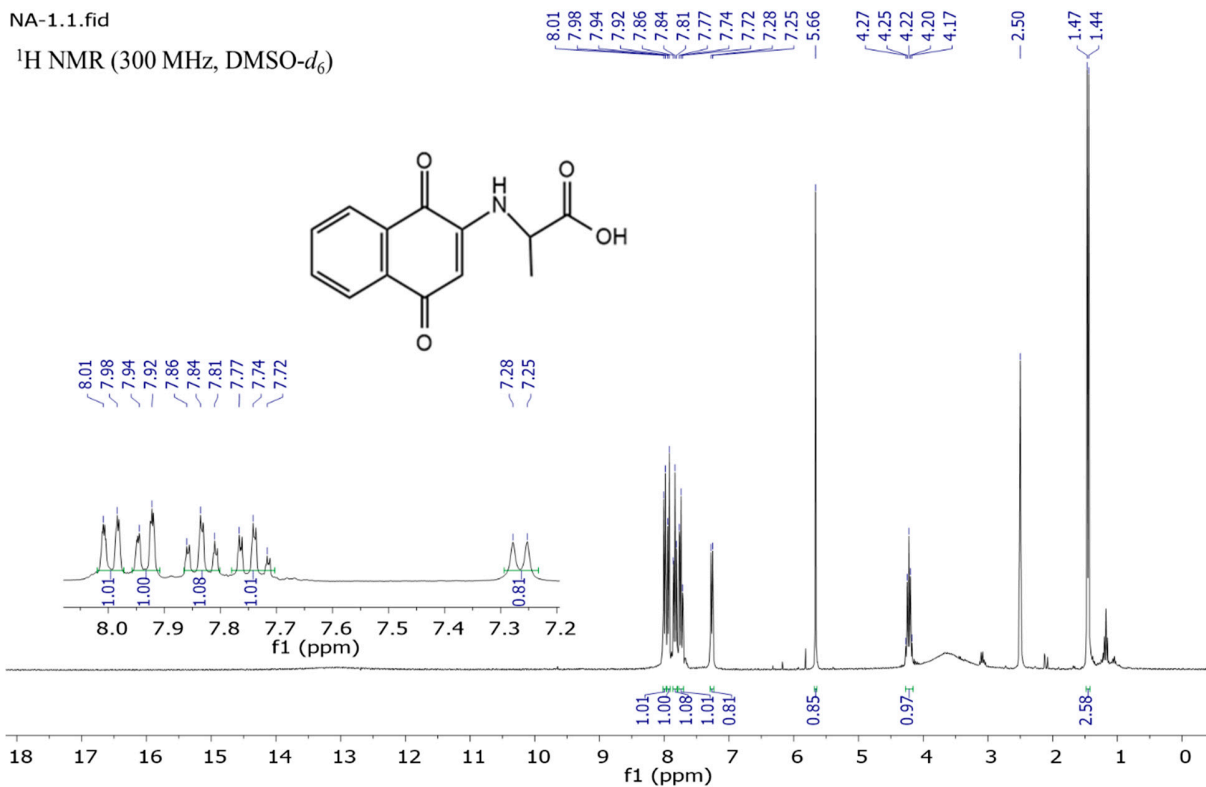

(3c)

NM-1.1.fid

<sup>1</sup>H NMR (300 MHz, DMSO-d<sub>6</sub>)

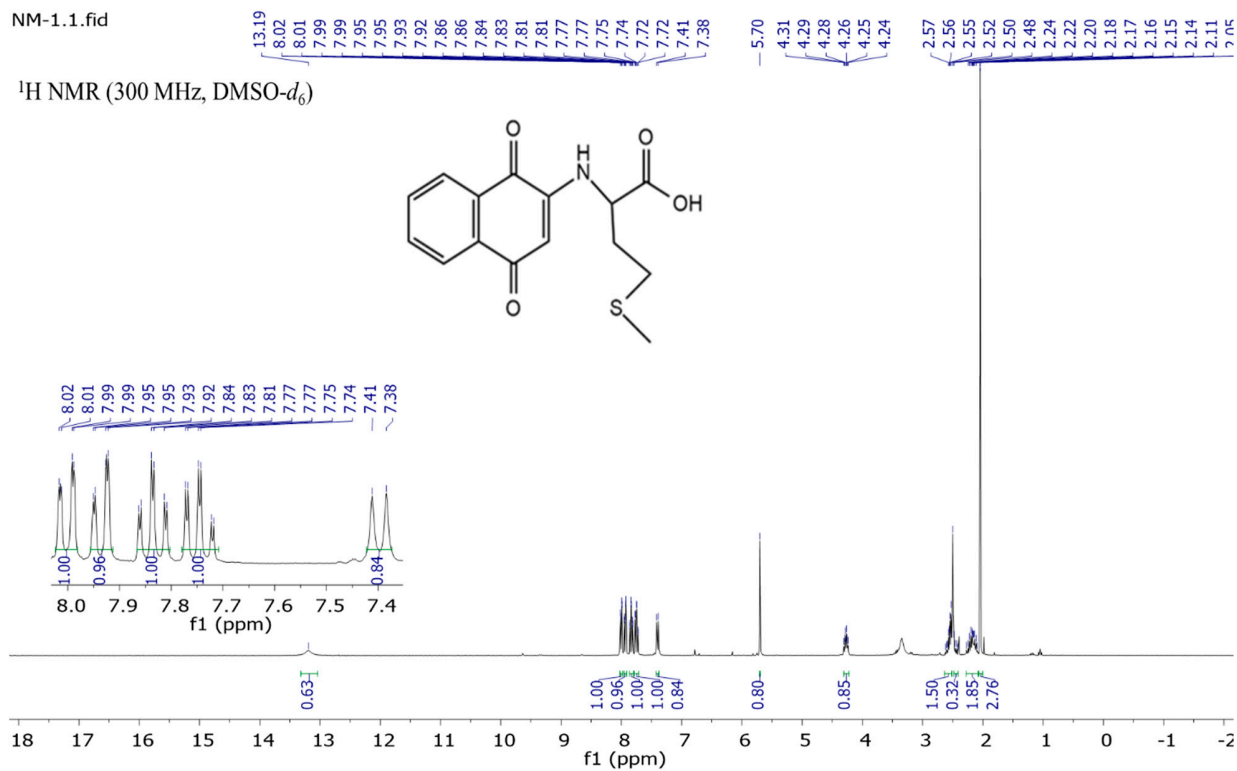

NM-1.2.fid

<sup>13</sup>C NMR (75 MHz, DMSO)

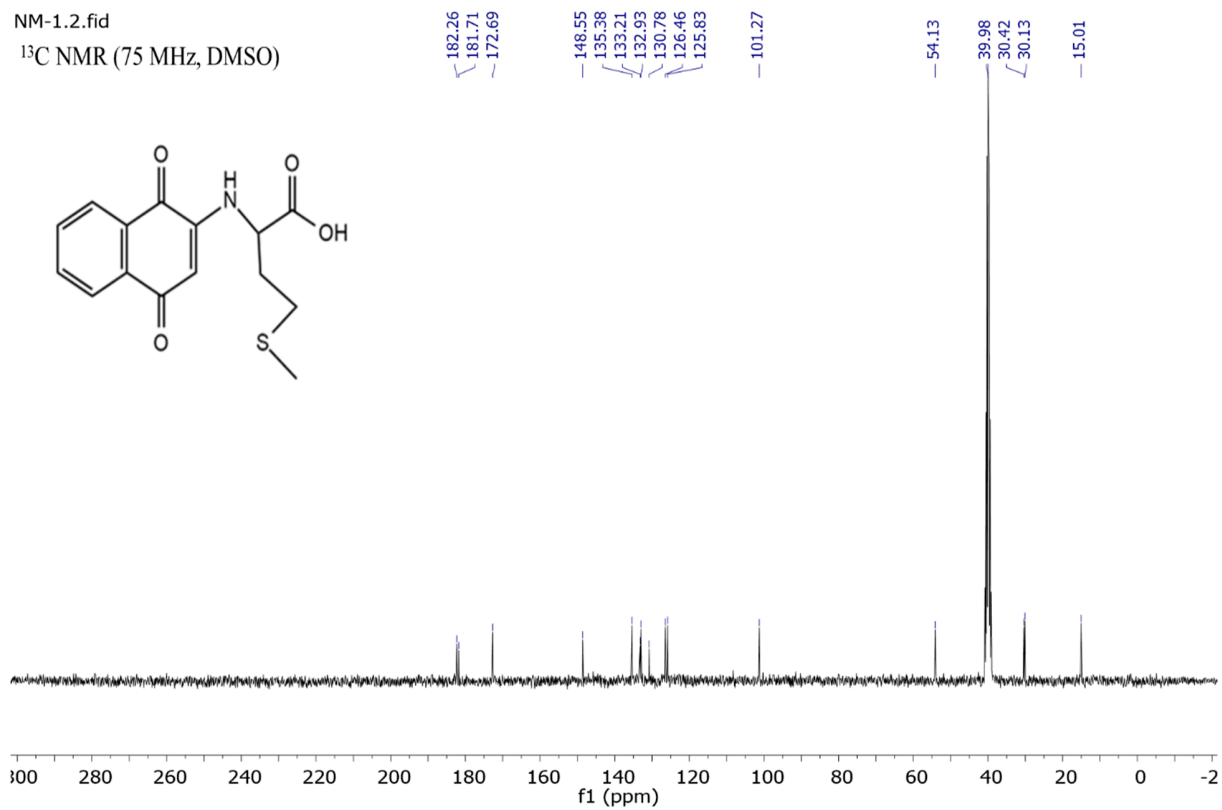



**(3d)**

NF.1.fid <sup>1</sup>H NMR (300 MHz, DMSO-d<sub>6</sub>)  
H

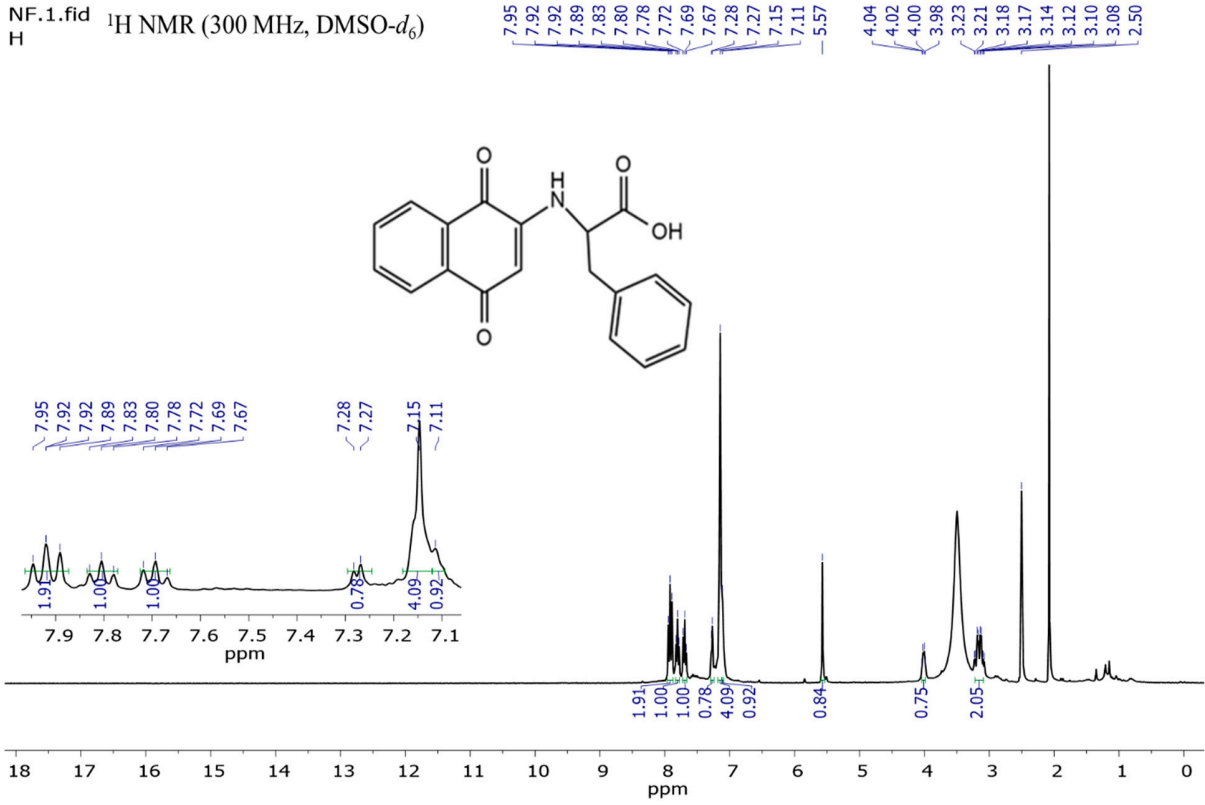

**(3e)**

NA.sn.1.fid  
H  
<sup>1</sup>H NMR (300 MHz, DMSO-d<sub>6</sub>)

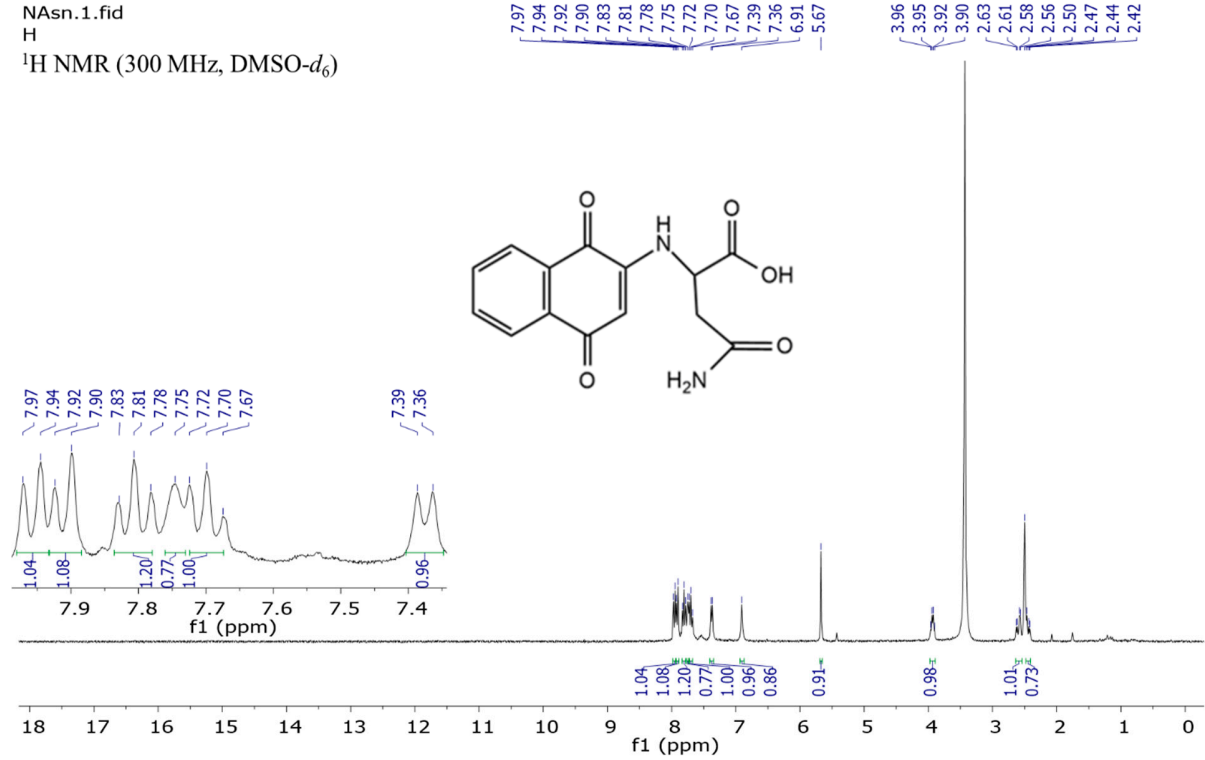

NAsn.2.fid

<sup>13</sup>C NMR (75 MHz, DMSO)

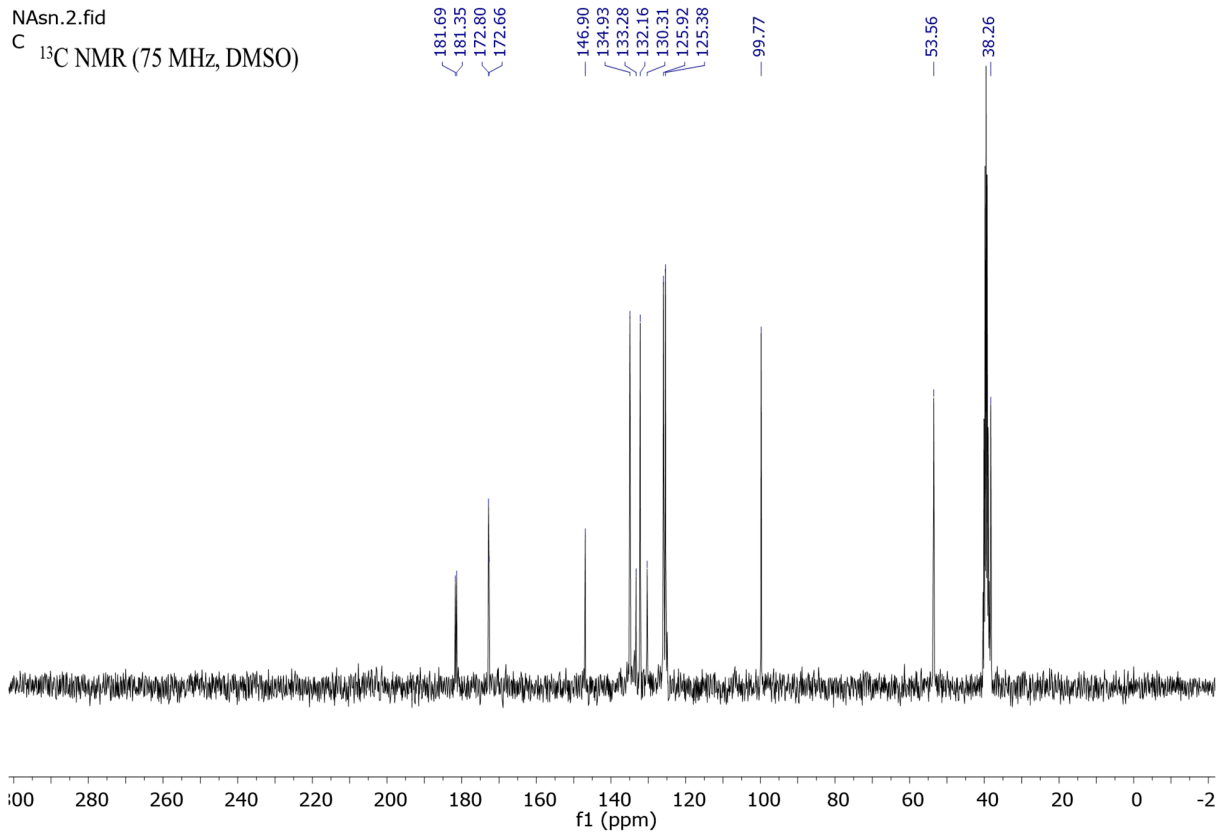

Amino acids-2,3-dichloronaphthoquinone derivatives:

(4a)

<sup>1</sup>H NMR (300 MHz, DMSO-d<sub>6</sub>)

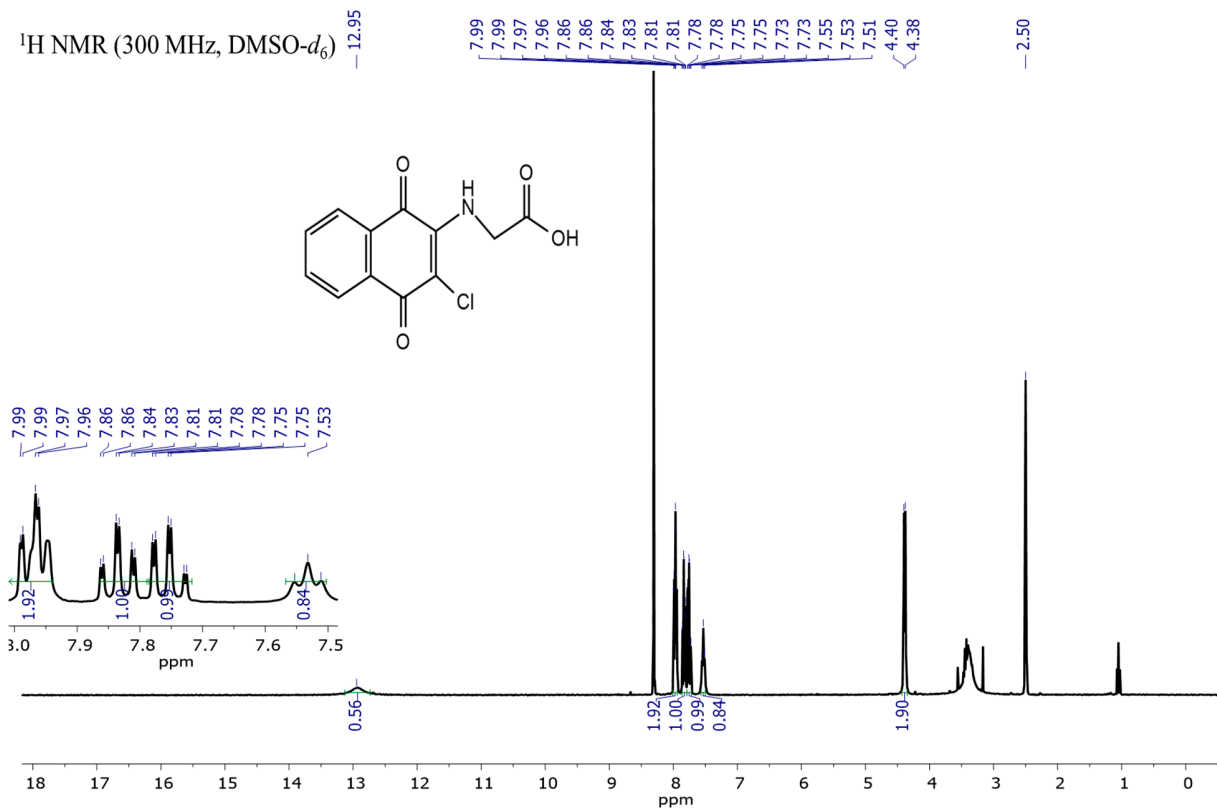

(4b)

NCIA MeOD

$^1\text{H}$  NMR (400 MHz, Methanol- $d_4$ )

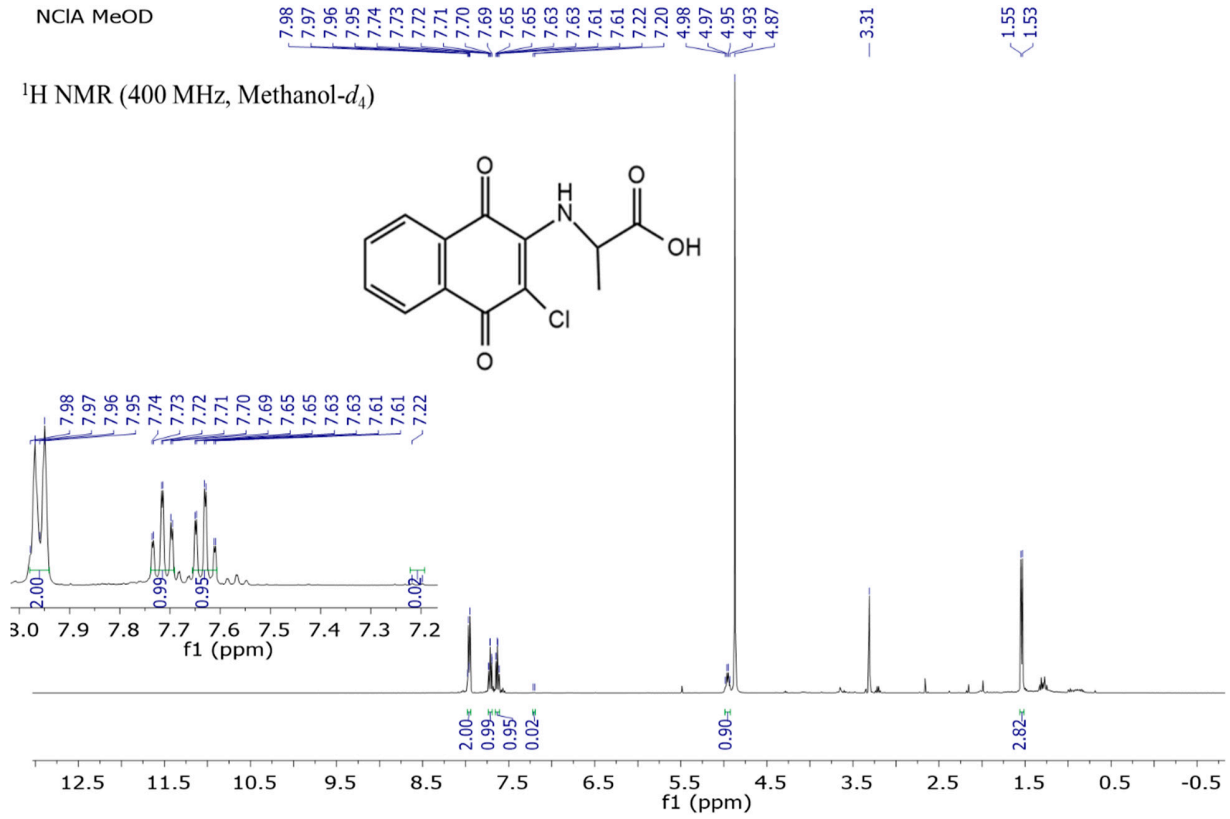

NCIA MeOD

$^{13}\text{C}$  NMR (101 MHz, MeOD)

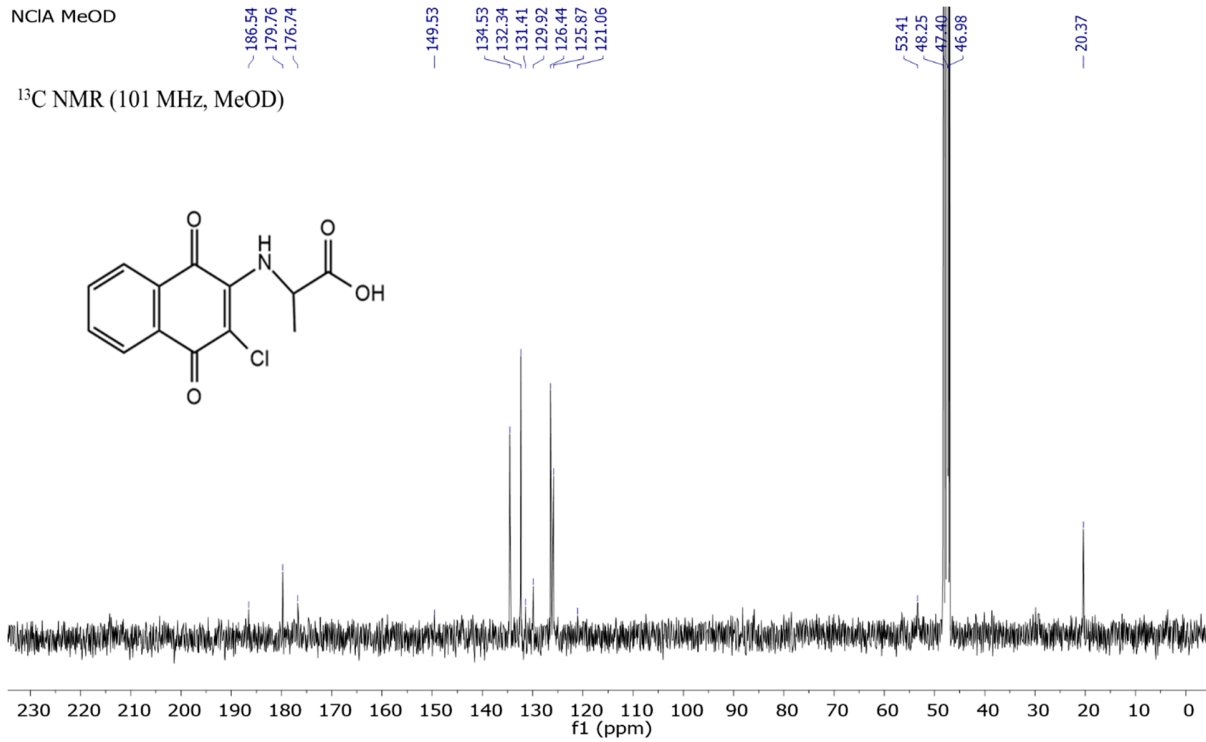

(4c)

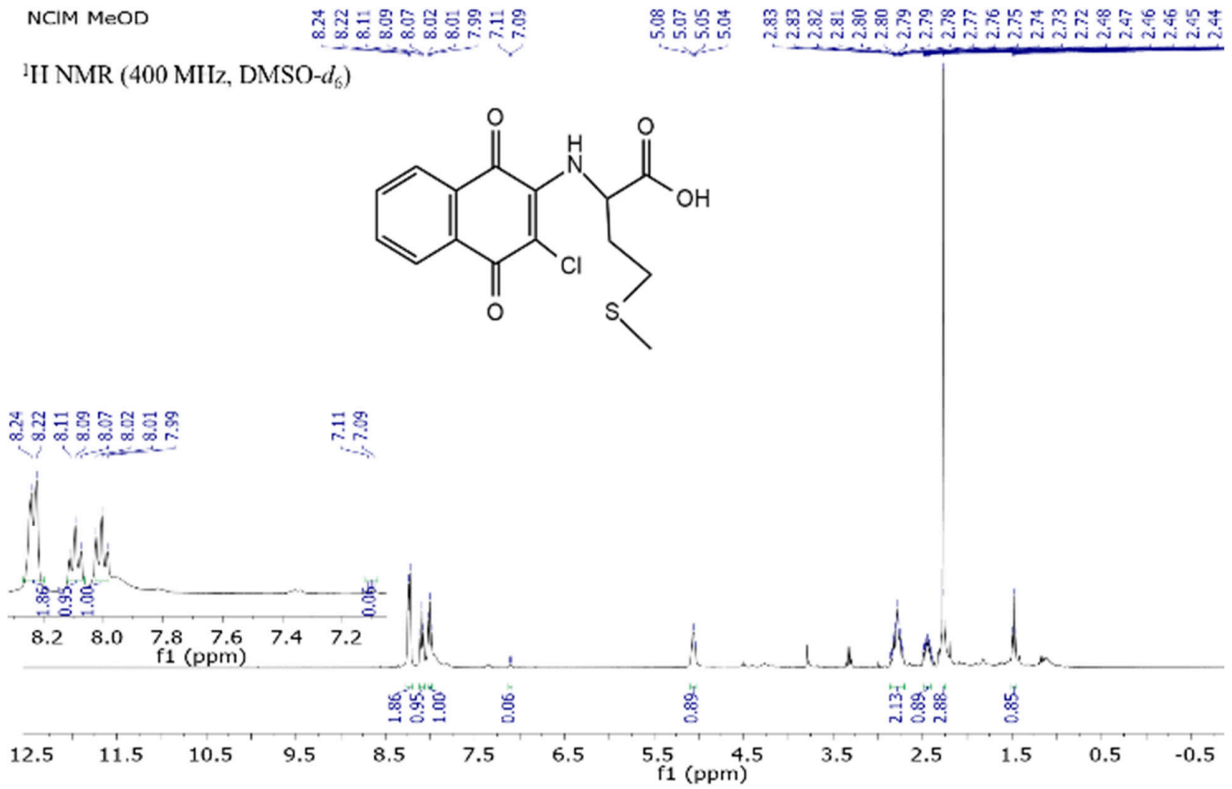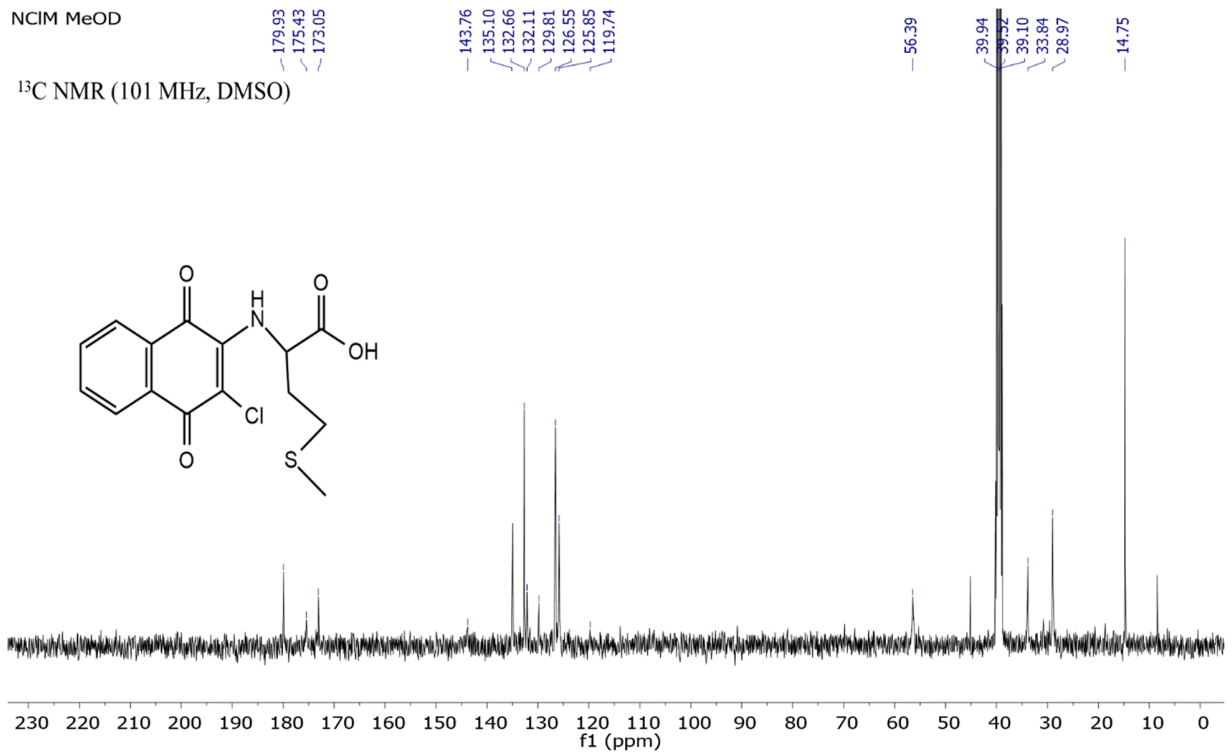

(4d)

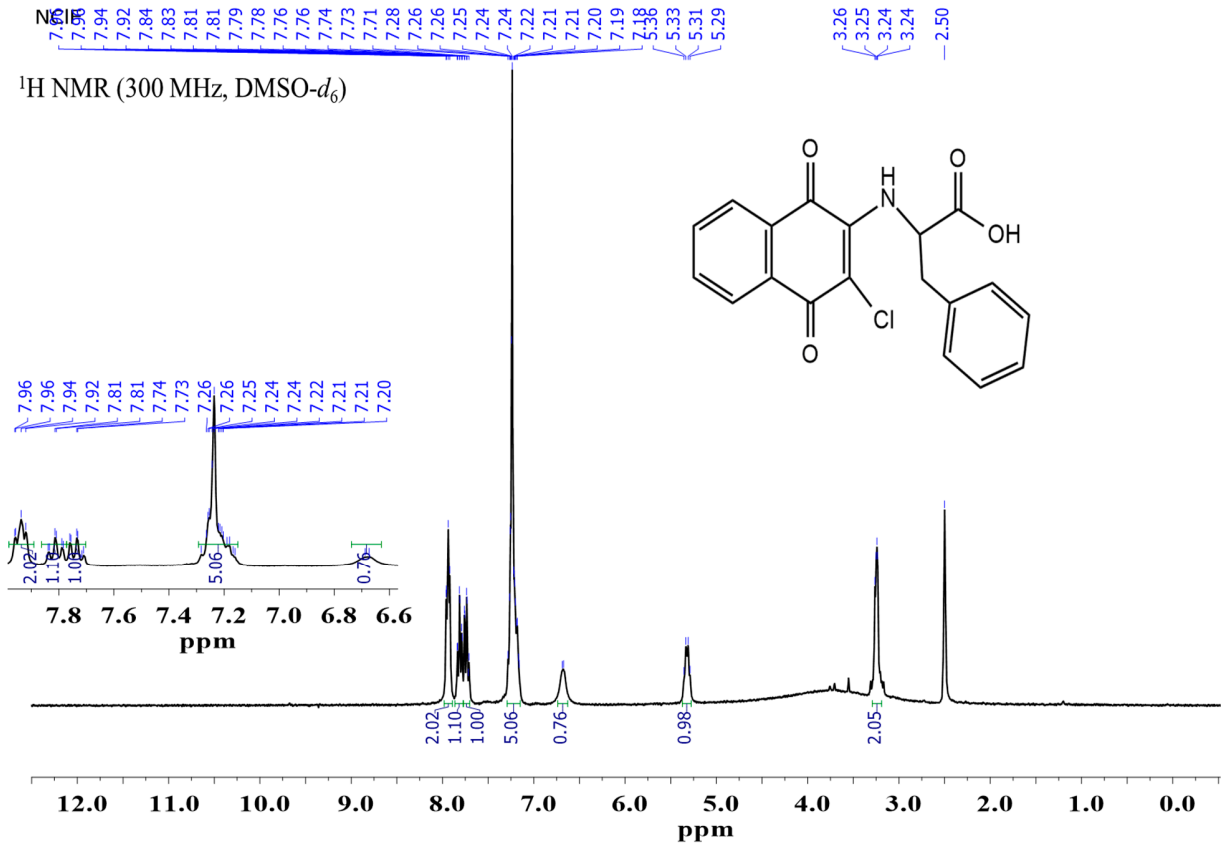

(4e)

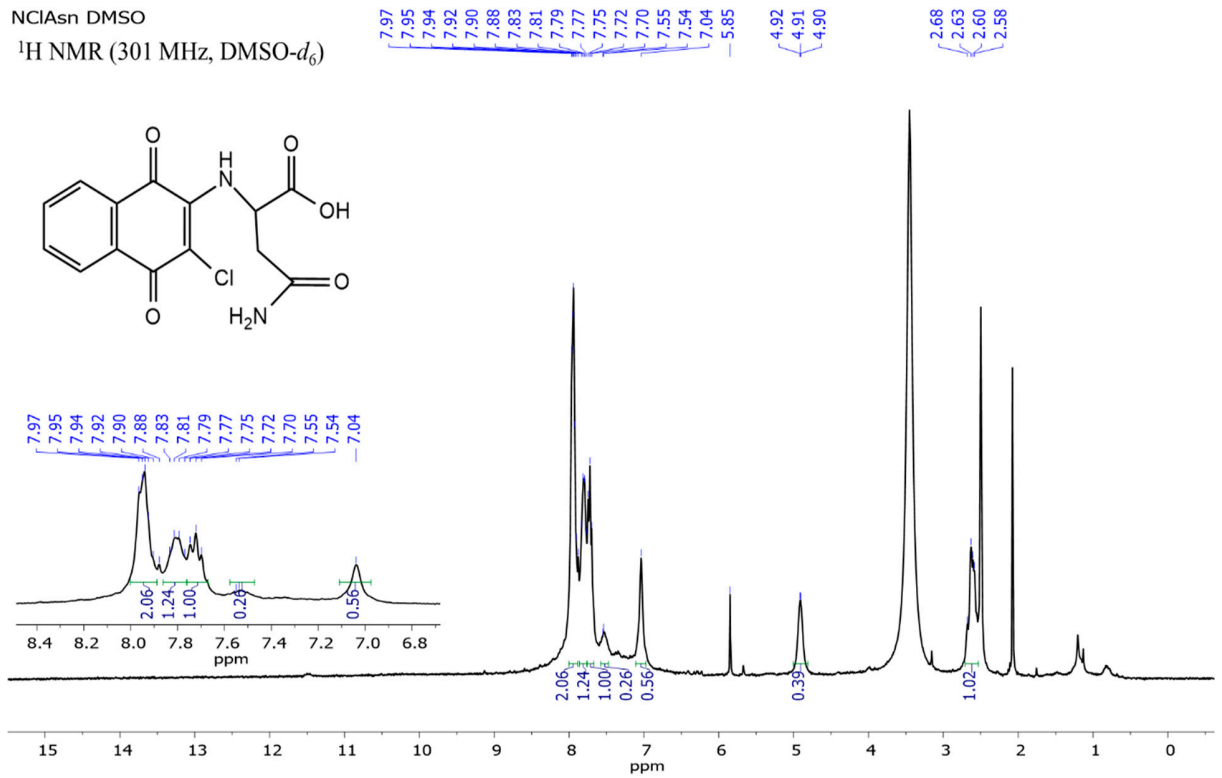

NCIAsn DMSO

$^{13}\text{C}$  NMR (75 MHz, DMSO)

181.69  
181.35  
172.80  
172.66

146.90  
134.93  
133.28  
132.16  
130.31  
125.92  
125.38

99.77

53.56

39.52  
38.26

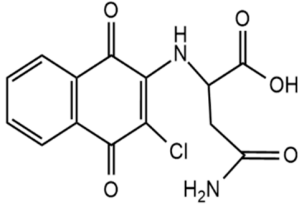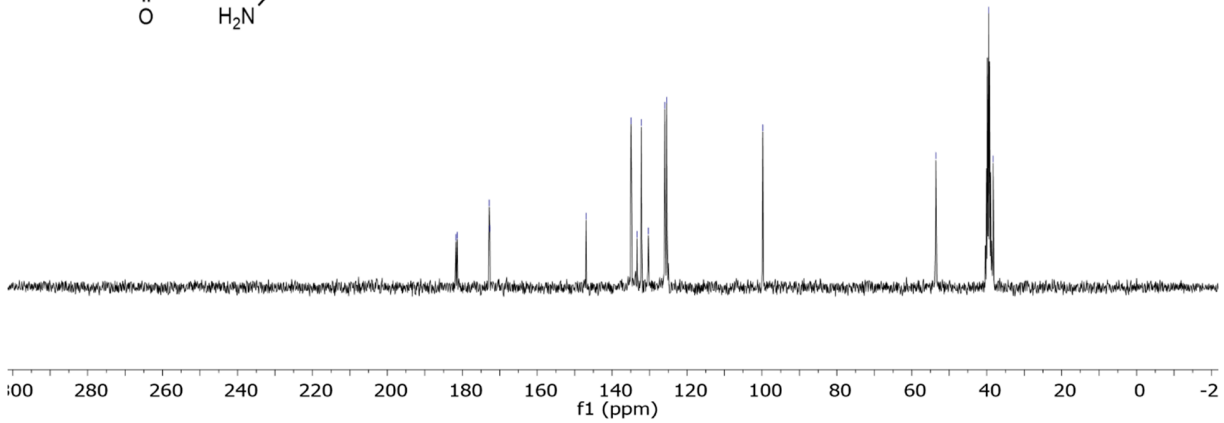

### 3. Mass spectrometry characterization of compounds 3c, 3e, 4b, 4c and 4e. (3c)

Data:U-278 NM1-MS-GC

Sample Name:Lizbeth Rodriguez

Description:

Ionization Mode:ESI+

History:Determine m/z[Peak Detect[Centroid,30,Area];Correct Base[1.0%]];Correct Base[5.0%];Average[MS[1] 0..1)

Acquired:2/28/2018 10:26:25 AM

Operator:AccuTOF

Mass Calibration data:Cal Peg 600

Created:3/7/2018 9:26:00 AM

Created by:

Charge number:1

Tolerance:2.00(mmu)

Unsaturation Number:0.0 .. 20.0 (Fraction:Both)

Element: $^{12}\text{C}$ :0 .. 22,  $^1\text{H}$ :1 .. 50,  $^{14}\text{N}$ :0 .. 3,  $^{16}\text{O}$ :3 .. 5,  $^{32}\text{S}$ :1 .. 1

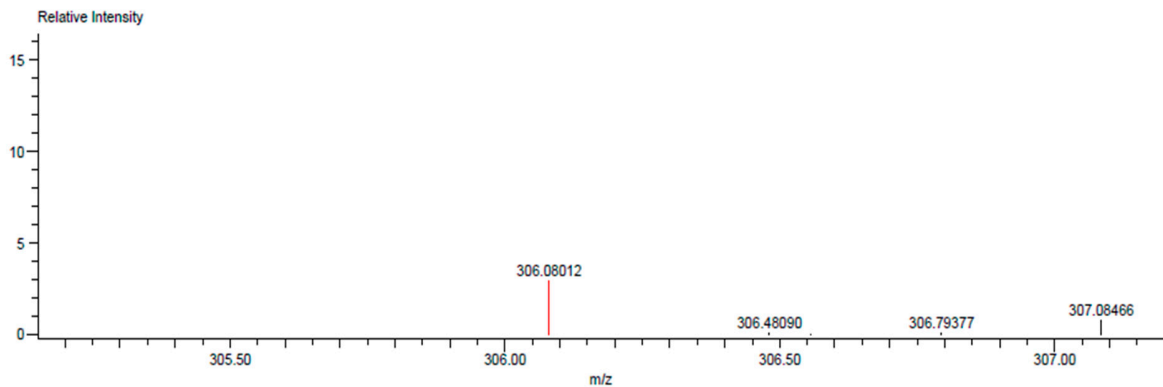

| Mass      | Intensity | Calc. Mass | Mass Difference (mmu) | Mass Difference (ppm) | Possible Formula                                                | Unsaturation Number |
|-----------|-----------|------------|-----------------------|-----------------------|-----------------------------------------------------------------|---------------------|
| 306.08012 | 7591.35   | 306.08000  | 0.12                  | 0.38                  | $^{12}\text{C}_{15}\text{H}_{16}\text{N}_1\text{O}_4\text{S}_1$ | 9.5                 |

(3e)

|                               |                   |                       |                             |
|-------------------------------|-------------------|-----------------------|-----------------------------|
| <b>Data Filename</b>          | NAsn.d            | <b>Sample Name</b>    | NAsn                        |
| <b>Sample Type</b>            | Sample            | <b>Position</b>       | P1-B3                       |
| <b>Instrument Name</b>        | LC QTOF-LANCIC    | <b>User Name</b>      |                             |
| <b>Acq Method</b>             | Ine directa pos.m | <b>Acquired Time</b>  | 8/2/2018 2:19:53 PM         |
| <b>IRM Calibration Status</b> | Success           | <b>DA Method</b>      | Default.m                   |
| <b>Comment</b>                |                   |                       |                             |
| <b>Sample Group</b>           |                   | <b>Info.</b>          |                             |
| <b>Stream Name</b>            | LC 1              | <b>Acquisition SW</b> | 6200 series TOF/6500 series |
|                               |                   | <b>Version</b>        | Q-TOF B.06.01 (B6172 SP1)   |

User Spectra

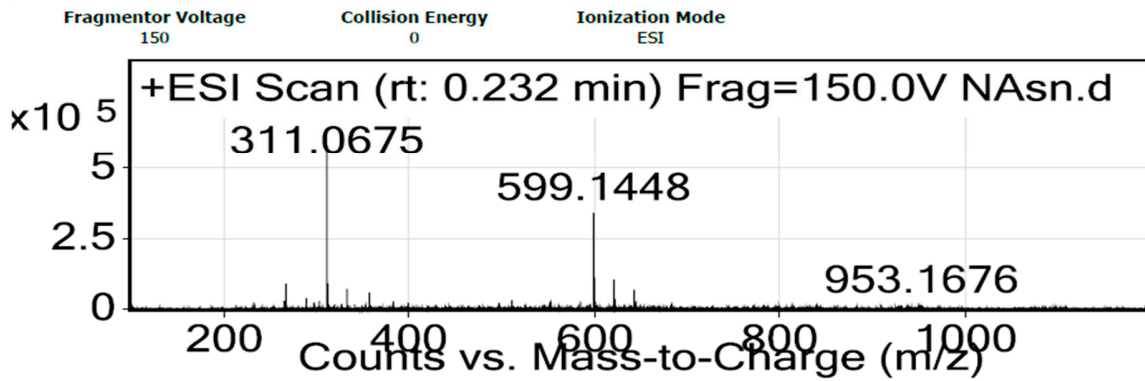

(4b)

|                                                                                                                                                                  |                                                   |
|------------------------------------------------------------------------------------------------------------------------------------------------------------------|---------------------------------------------------|
| Data: U-279 NCLA-MS                                                                                                                                              | Acquired: 2/28/2018 10:29:53 AM                   |
| Sample Name: Lizbeth Rodriguez                                                                                                                                   | Operator: AccuTOF                                 |
| Description:                                                                                                                                                     | Mass Calibration data: Cal Peg 600                |
| Ionization Mode: ESI+                                                                                                                                            | Created: 3/7/2018 9:35:13 AM                      |
| History: Determine m/z [Peak Detect [Centroid, 30, Area]; Correct Base [1.0%]; Correct Base [5.0%]; Average (MS [1] 1..1)                                        | Created by:                                       |
| Charge number: 1      Tolerance: 2.00 (mmu)                                                                                                                      | Unsaturation Number: 5.0 .. 20.0 (Fraction: Both) |
| Element: <sup>12</sup> C: 0 .. 22, <sup>1</sup> H: 1 .. 50, <sup>35</sup> Cl: 1 .. 1, <sup>37</sup> Cl: 0 .. 1, <sup>14</sup> N: 0 .. 3, <sup>16</sup> O: 3 .. 5 |                                                   |

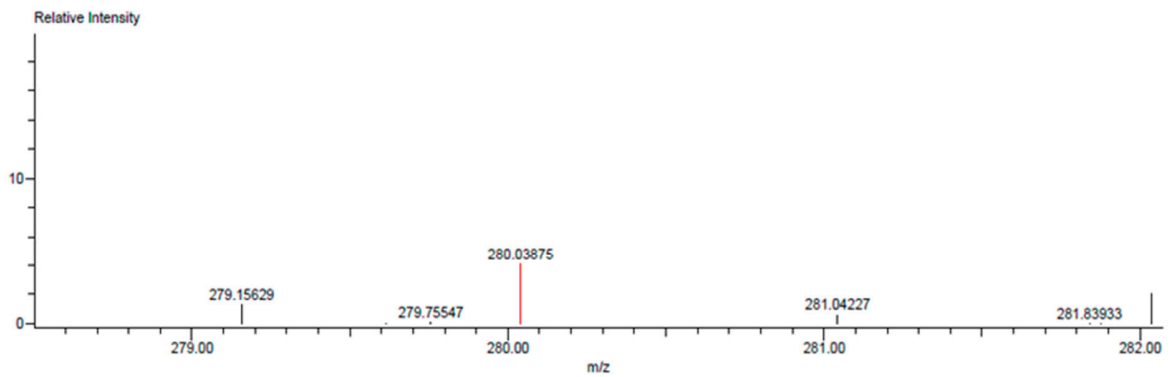

| Mass      | Intensity | Calc. Mass | Mass Difference (mmu) | Mass Difference (ppm) | Possible Formula                                                                                                                                   | Unsaturation Number |
|-----------|-----------|------------|-----------------------|-----------------------|----------------------------------------------------------------------------------------------------------------------------------------------------|---------------------|
| 280.03875 | 6898.75   | 280.03766  | 1.09                  | 3.88                  | <sup>12</sup> C <sub>13</sub> <sup>1</sup> H <sub>11</sub> <sup>35</sup> Cl <sub>1</sub> <sup>14</sup> N <sub>1</sub> <sup>16</sup> O <sub>4</sub> | 8.5                 |

(4c)

Data:U-280 NCLM-MS  
Sample Name:Lizbeth Rodriguez  
Description:  
Ionization Mode:ESI+  
History:Determine m/z[Peak Detect[Centroid,30,Area];Correct Base[1.0%]];Correct Base[5.0%];Average[MS[1] 1..1]

Acquired:2/28/2018 10:32:39 AM  
Operator:AccuTOF  
Mass Calibration data:Cal Peg 600  
Created:3/7/2018 9:48:45 AM  
Created by:

Charge number:1  
Tolerance:2.00(mmu)  
Element:<sup>12</sup>C:0 .. 22, <sup>1</sup>H:1 .. 50, <sup>35</sup>Cl:1 .. 1, <sup>37</sup>Cl:0 .. 1, <sup>14</sup>N:0 .. 3, <sup>16</sup>O:3 .. 5, <sup>32</sup>S:1 .. 1

Unsaturation Number:5.0 .. 20.0 (Fraction:Both)

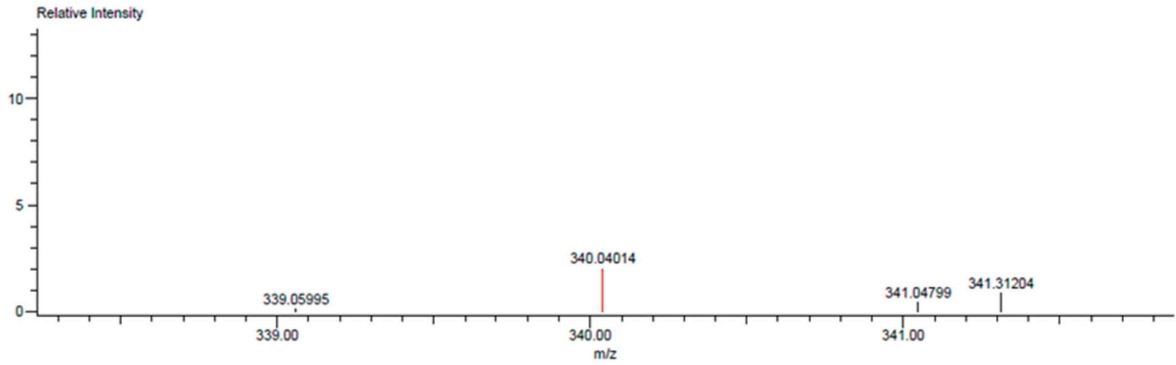

| Mass      | Intensity | Calc. Mass | Mass Difference (mmu) | Mass Difference (ppm) | Possible Formula                                                                                                                                                               | Unsaturation Number |
|-----------|-----------|------------|-----------------------|-----------------------|--------------------------------------------------------------------------------------------------------------------------------------------------------------------------------|---------------------|
| 340.04014 | 41284.85  | 340.04103  | -0.89                 | -2.61                 | <sup>12</sup> C <sub>15</sub> <sup>1</sup> H <sub>15</sub> <sup>32</sup> S <sub>1</sub> <sup>14</sup> N <sub>1</sub> <sup>16</sup> O <sub>4</sub> <sup>32</sup> S <sub>1</sub> | 9.5                 |

(4e)

|                               |                   |                      |                     |
|-------------------------------|-------------------|----------------------|---------------------|
| <b>Data Filename</b>          | NCL2Asn.d         | <b>Sample Name</b>   | NCL2Asn             |
| <b>Sample Type</b>            | Sample            | <b>Position</b>      | P1-B5               |
| <b>Instrument Name</b>        | LC QTOF-LANCIC    | <b>User Name</b>     |                     |
| <b>Acq Method</b>             | Ine directa pos.m | <b>Acquired Time</b> | 8/2/2018 2:34:02 PM |
| <b>IRM Calibration Status</b> | Success           | <b>DA Method</b>     | Default.m           |
| <b>Comment</b>                |                   |                      |                     |

|                     |      |                               |                                                       |
|---------------------|------|-------------------------------|-------------------------------------------------------|
| <b>Sample Group</b> |      | <b>Info.</b>                  |                                                       |
| <b>Stream Name</b>  | LC 1 | <b>Acquisition SW Version</b> | 6200 series TOF/6500 series Q-TOF B.06.01 (B6172 SP1) |

User Spectra

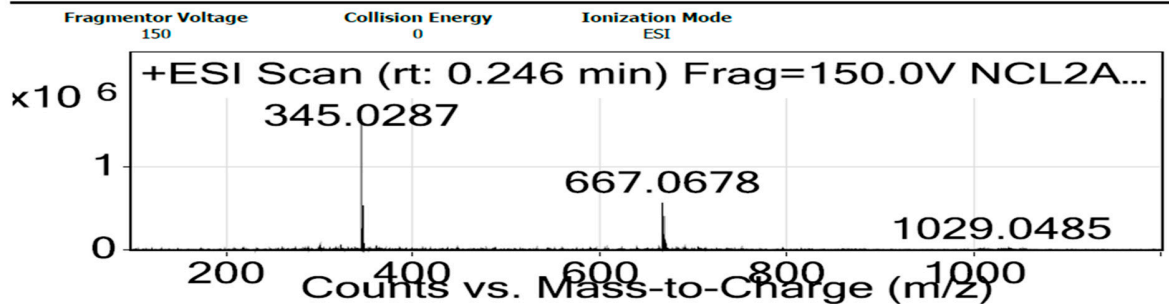

Supplement: molecules-24-04285-s001.pdf [file molecules-24-04285-s001.pdf]
